# Supplementary material for: Gram-Negative Infections in Adult Intensive Care Units of Latin America and the Caribbean
Source: Hindawi journal article supplement (doi:10.1155/2014/480463), 2014-01-01
Supplement: f1 [file 480463.f1.pdf]

SUPPLEMENTARY TABLE. Standard features of the observational studies conducted in Latin American and Caribbean ICUs, which were identified from the literature search and selected by the authors according to predefined criteria (i.e.,  $n > 50$  patients or isolates; dates, June 6, 2002–June 20, 2013).

| Reference                   | Study design                               | Location     | No. of ICUs            | Collection period            | Anatomical collection site        | No. and type of patients (or isolates)                                                                                                               |
|-----------------------------|--------------------------------------------|--------------|------------------------|------------------------------|-----------------------------------|------------------------------------------------------------------------------------------------------------------------------------------------------|
| <b>ARGENTINA</b>            |                                            |              |                        |                              |                                   |                                                                                                                                                      |
| Luna et al. 2003 [17]       | Prospective, multicenter                   | Buenos Aires | 6                      | 1999–2001                    | Respiratory tract                 | 472 MV patients hospitalized for > 72 hours                                                                                                          |
| Luna et al. 2006 [36]       | Prospective, multicenter                   | Buenos Aires | 6                      | 1999–2003                    | Respiratory tract                 | 76 MV patients with bacteriologically confirmed VAP                                                                                                  |
| Barbola et al. 2008 [43]    | 10-week, prospective cohort, single center | Buenos Aires | 1                      | July–Sept 2003               | Air, environment, and staff hands | 1042 screening samples                                                                                                                               |
| Rios et al. 2007 [28]       | Retrospective, multicenter                 | Buenos Aires | 3                      | 2001–2004                    | Respiratory tract                 | 61 episodes of VAP caused by <i>Acinetobacter spp</i> or <i>P. aeruginosa</i> (30 by carbapenem-susceptible and 31 by colistin-susceptible isolates) |
| Lossa et al. 2008 [16]      | Cross-sectional, multicenter               | Nationwide   | 26 in 2004; 27 in 2005 | May–June 2004; May–June 2005 | Blood, respiratory tract, urine   | 158 admissions in 2004; 201 admissions in 2005                                                                                                       |
| Weyland et al. 2011 [39]    | Prospective, case-control                  | Buenos Aires | 1                      | 2000–2005                    | Respiratory tract                 | 435 isolates from 430 patients                                                                                                                       |
| <b>BRAZIL</b>               |                                            |              |                        |                              |                                   |                                                                                                                                                      |
| Toufen Jr. et al. 2003 [18] | 1-day point prevalence,                    | São Paulo    | 19                     | 2000                         | Blood, respiratory                | 126 occupying a bed in a 24-hour period                                                                                                              |

| multicenter                                   |                                            |                       |              |           | tract, urine,<br>surgical<br>wounds              |                                                                                                                                       |
|-----------------------------------------------|--------------------------------------------|-----------------------|--------------|-----------|--------------------------------------------------|---------------------------------------------------------------------------------------------------------------------------------------|
| Martins de Queiroz Guimarães et al. 2006 [21] | Prospective, single-center                 | Rio de Janeiro        | 1            | 1999–2001 | Respiratory tract                                | 278 on MV for > 24 hours                                                                                                              |
| Furtado et al. 2009 [38]                      | Retrospective, case-control, single-center | São Paulo             | 1            | 2003–2004 | Any site                                         | 63 imipenem-resistant <i>P. aeruginosa</i> cases > 48 hours after admission versus 182 controls                                       |
| Lima et al. 2007 [22]                         | Prospective, single-center                 | São Paulo             | 1            | 2006      | Blood, respiratory tract, urine                  | 71 occupying a bed in a 24-hour period and followed until discharge or death                                                          |
| de Andrade da Rocha et al. 2012 [20]          | Prospective, single-center                 | Uberlândia            | 1            | 2005–2006 | Respiratory tract                                | 275 on MV for > 48 hours                                                                                                              |
| Rodrigues et al. 2009 [23]                    | Prospective, single-center                 | Rio de Janeiro        | 1            | 2005–2007 | Respiratory tract                                | 233 on MV for > 48 hours                                                                                                              |
| Rubio et al. 2013 [29]                        | Prospective, single-center                 | São José do Rio Preto | NR (89 beds) | 1999–2008 | All sites                                        | 10,732 multidrug resistant Gram-negative bacterial isolates collected hospital wide                                                   |
| de Oliveira et al. 2010 [19]                  | Prospective, single-center                 | Minas Gerais          | 1            | 2005–2008 | Blood, respiratory tract, urine, surgical wounds | 2300 admissions with a stay of > 24 hours                                                                                             |
| Furtado et al. 2009 [37]                      | Retrospective, case-control, single-center | São Paulo             | 1            | 2006–2008 | All sites                                        | 58 imipenem-resistant <i>P. aeruginosa</i> cases > 48 hours after admission versus 47 imipenem-susceptible <i>P. aeruginosa</i> cases |

|                                       |                                               |            |                                                       |           |                                 |                                                                                                                                         |
|---------------------------------------|-----------------------------------------------|------------|-------------------------------------------------------|-----------|---------------------------------|-----------------------------------------------------------------------------------------------------------------------------------------|
|                                       |                                               |            |                                                       |           |                                 | versus 182 controls                                                                                                                     |
| Marra et al. 2011 [24]                | Prospective, multicenter                      | Nationwide | ~16                                                   | 2007–2010 | Blood                           | 1257 with ≥ 1 culture of blood sampled ≥ 48 hours after admission yielding a pathogenic organism                                        |
| Cartaxo Salgado et al. 2011 [66]      | Retrospective, case control, single-center    | Brasilia   | 1                                                     | 2007–2009 | NR                              | 401 patients                                                                                                                            |
| CHILE                                 |                                               |            |                                                       |           |                                 |                                                                                                                                         |
| Bustamante et al. 2007 [25]           | Prospective, multicenter                      | Nationwide | 39 with urine data; 38 with MV data; 43 with BSI data | 2007      | Blood, respiratory tract, urine | 10,237 with a permanent urinary catheter; 5265 on MV; 13,411 with a CVC                                                                 |
| Silva et al. 2011 [30]                | Prospective, multicenter, independent network | Nationwide | 14                                                    | 2009      | All sites                       | ≥ 984 isolates                                                                                                                          |
| COLOMBIA                              |                                               |            |                                                       |           |                                 |                                                                                                                                         |
| Briceño et al. 2010 [31]              | Prospective, multicenter                      | Nationwide | 14                                                    | 2006–2008 | All sites                       | 22,344 isolates                                                                                                                         |
| Villalobos Rodríguez et al. 2011 [32] | Retrospective, multicenter                    | Nationwide | 79                                                    | 2007–2009 | All sites                       | 25,915 isolates                                                                                                                         |
| Lemos et al. 2011 [40]                | Prospective, multicenter                      | Bogotá     | 3                                                     | 2006–2010 | All sites                       | 62 with HAI multidrug-resistant <i>A. baumannii</i> and 103 patients with drug-sensitive <i>A. baumannii</i> infection ≥ 48 hours after |

| admission               |                                               |                                     |   |           |                                                              |                                                                         |
|-------------------------|-----------------------------------------------|-------------------------------------|---|-----------|--------------------------------------------------------------|-------------------------------------------------------------------------|
| CUBA                    |                                               |                                     |   |           |                                                              |                                                                         |
| Medell et al. 2012 [26] | Prospective, single-center                    | Havana                              | 3 | 2007–2010 | Respiratory tract                                            | 741 on MV                                                               |
| MEXICO                  |                                               |                                     |   |           |                                                              |                                                                         |
| Zaidi et al. 2002 [33]  | Prospective, nested case control, multicenter | Yucatán, Mexico City, and Michoacán | 4 | 1995–1996 | All sites                                                    | 113 who acquired a HAI (67 cases who died and 46 controls who survived) |
| TRINIDAD AND TOBAGO     |                                               |                                     |   |           |                                                              |                                                                         |
| Orrett, 2004 [35]       | Prospective, single-center                    | San Fernando, Trinidad              | 1 | 1998–2002 | All sites but primarily sputum, urine, wound and blood (93%) | 530 consecutive surgical and medical patients                           |

ICU: intensive care unit, MV: mechanical ventilation, VAP: ventilator-associated pneumonia, NR: not reported, BSI: bloodstream infection, CVC: central venous catheter, HAI: health care–associated infection.
